# Supplementary material for: Growth of metal-catalyst-free nitrogen-doped metallic single-wall carbon nanotubes
Source: Royal Society of Chemistry journal article supplement (doi:10.1039/c4nr03172e), 2014-01-01
Supplement: c4nr03172e1.pdf [file c4nr03172e1.pdf]

## Supporting Information

# Growth of metal-catalyst-free nitrogen-doped metallic single-wall carbon nanotubes

*Jin-Cheng Li<sup>§</sup>, Peng-Xiang Hou<sup>§</sup>, Li-Li Zhang, Chang Liu,\* Hui-Ming Cheng*

Shenyang National Laboratory for Materials Science, Institute of Metal Research,  
Chinese Academy of Sciences, Shenyang 110016, PR China

<sup>§</sup>These authors are equal major contributors

Corresponding Author: [cliu@imr.ac.cn](mailto:cliu@imr.ac.cn) (C. Liu)

SII. Estimation of the number of electrons transferred in the oxygen reduction reaction.

For a precise estimate of the number of electrons transferred ( $n$ ), we analyzed the kinetic parameters on the basis of the Koutecky–Levich equations<sup>1</sup>:

$$\frac{1}{J} = \frac{1}{J_L} + \frac{1}{J_K} = \frac{1}{B\omega^{1/2}} + \frac{1}{J_K}$$

$$B = 0.62nFC_0(D_0)^{2/3}\nu^{-1/6}$$

$$J_K = \frac{1}{nkFC_0}$$

where  $J$  is the measured current density,  $J_K$  and  $J_L$  are the kinetic- and diffusion-limiting current densities,  $\omega$  is the angular velocity,  $F$  is the Faraday constant ( $F = 96500 \text{ C/mol}$ ),  $C_0$  is the bulk concentration of  $\text{O}_2$  ( $C_0 = 1.2 \times 10^{-6} \text{ mol/cm}^3$ ),  $D_0$  is the diffusion coefficient of  $\text{O}_2$  in 0.1 M KOH solution ( $D_0 = 1.9 \times 10^{-5} \text{ cm}^2/\text{s}$ ),  $\nu$  is the kinematic viscosity of the electrolyte ( $\nu = 0.01 \text{ cm}^2/\text{s}$ ), and  $k$  is the electron-transfer rate constant.

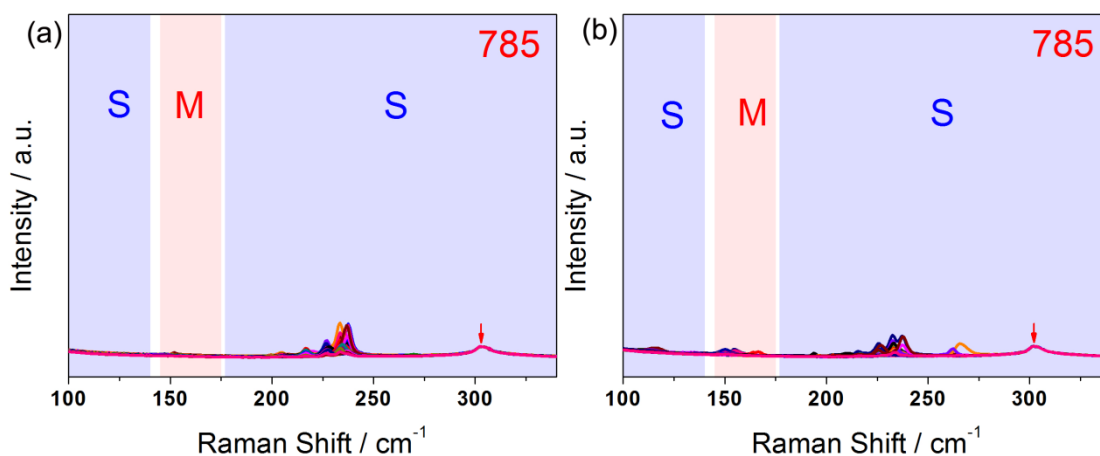

Figure S1. Raman spectra of the (a) N-doped and (b) un-doped SWCNTs excited with 785 nm lasers. The regions corresponding to semiconducting and the metallic transitions are labeled as S (cyan zone) and M (magenta zone). Each spectrum is normalized with respect to the  $303\text{ cm}^{-1}$  peak (red arrow) from the Si/SiO<sub>2</sub> substrate.

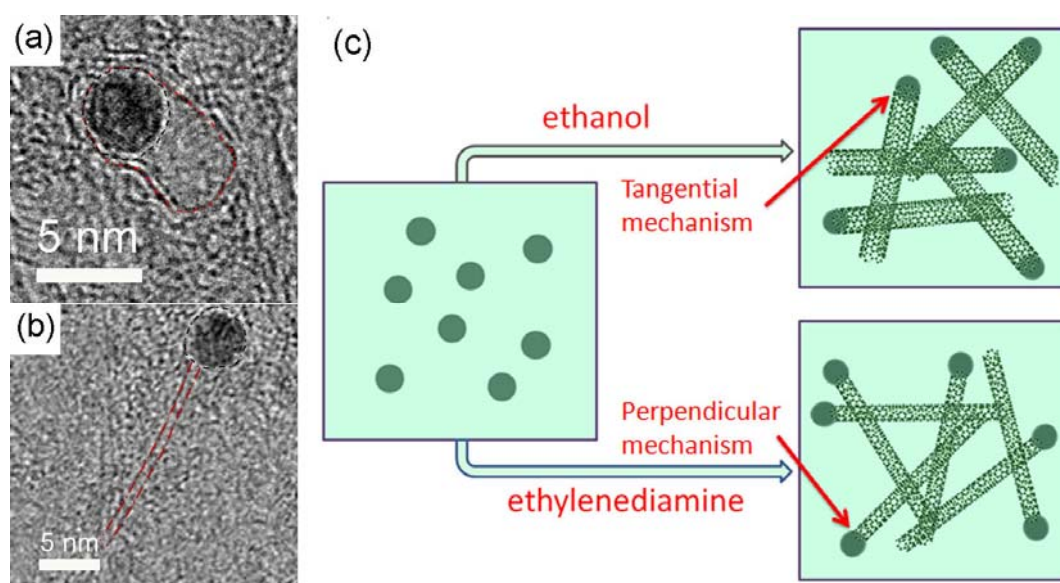

Figure S2. TEM images of (a) an un-doped and (b) a N-doped SWCNT. (c) Schematic showing the growth mechanism of the un-doped (upper) and N-doped (lower) SWCNTs from the SiO<sub>x</sub> catalyst.

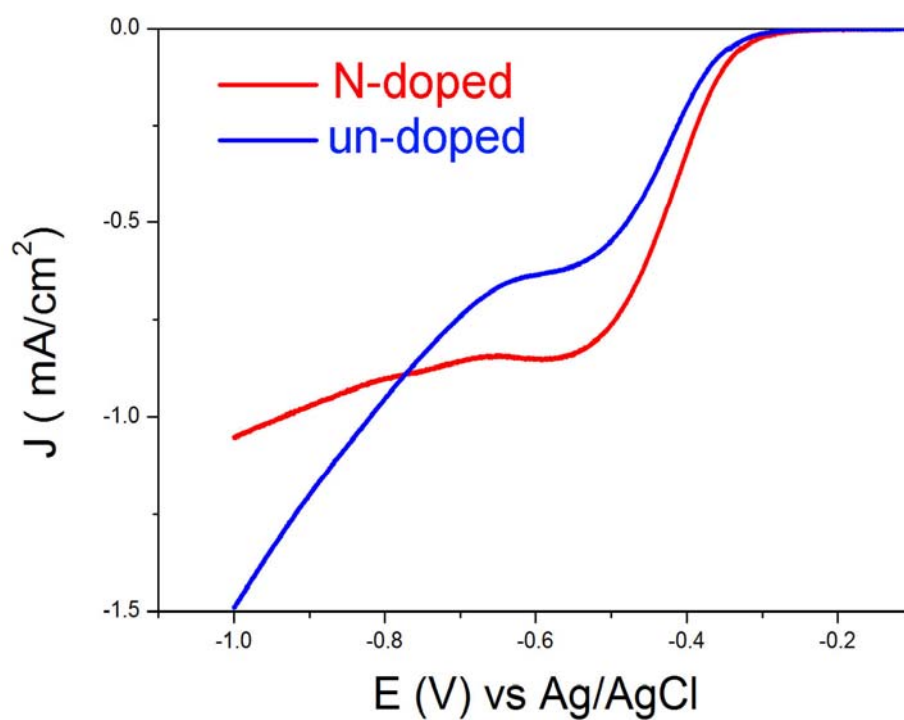

Figure S3. Comparison of the ORR polarization curves of the N-doped (red line) and un-doped (blue line) SWCNTs in O<sub>2</sub> saturated 0.1M KOH at 1600 rpm.

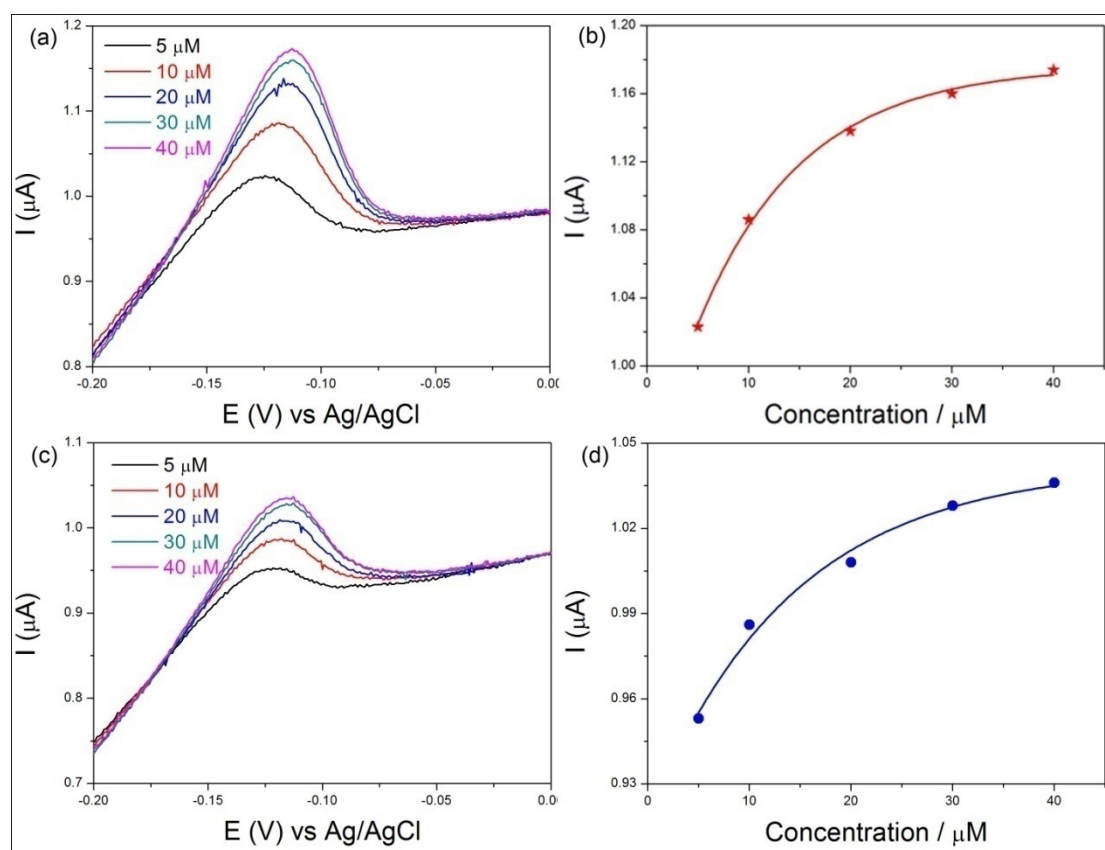

Figure S4. (a, c) CV curves and (b, d) current response curves of the (a, b) N-doped and (c, d) un-doped SWCNTs in PBS solutions containing different concentrations of AA.

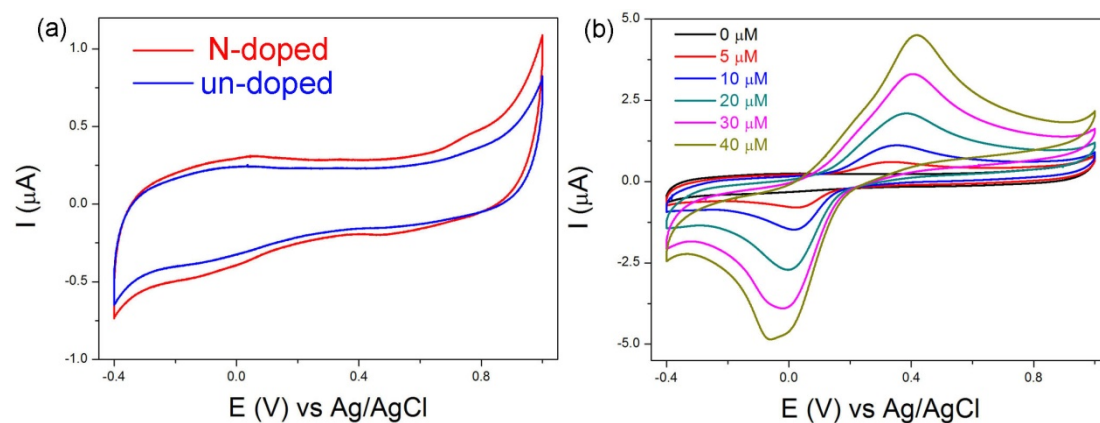

Figure S5. CV curves of (a) the N-doped and un-doped SWCNTs in a 0.025 M PBS (PH 6.9) solution saturated with Ar and (b) un-doped SWCNTs in PBS containing different concentrations of DA at a rate of 50 mV/s.

## Reference:

1. Zheng, Y.; Jiao, Y.; Chen, J.; Liu, J.; Liang, J.; Du, A.; Zhang, W.; Zhu, Z.; Smith, S. C.; Jaroniec, M.; Lu, G. Q.; Qiao, S. Z., Nanoporous Graphitic-C<sub>3</sub>N<sub>4</sub>@Carbon Metal-Free Electrocatalysts for Highly Efficient Oxygen Reduction. *Journal of the American Chemical Society* **2011**, *133* (50), 20116-20119.
